# Supplementary material for: Effect of Varying Glycemic Index Meals on Blood Glucose Control Assessed With Continuous Glucose Monitoring in Youth With Type 1 Diabetes on Basal-Bolus Insulin Regimens
Source: Oxford University Press journal article supplement (doi:10.2337/dc07-1879), 2008-03-28
Supplement: dc-07-1879_online_appendix.pdf [file dc-07-1879_online_appendix.pdf]

Online-Only Table. High and low glycemic index dietary conditions

|                                                             | GI      | CHO (g)      | Protein (g) | Fat (g)     | Kcal |
|-------------------------------------------------------------|---------|--------------|-------------|-------------|------|
| <b>HIGH GI DIETARY CONDITION</b>                            |         |              |             |             |      |
| <u>Breakfast</u>                                            |         |              |             |             |      |
| Corn flakes, $\frac{3}{4}$ c.                               | 77      | 18           | 1           | 0           | 77   |
| Oatmeal muffin (made with white flour and instant oatmeal)* | 69      | 22           | 3           | 3.5         | 128  |
| Orange juice, 6 oz.                                         | 52      | 20           | 1           | 0           | 85   |
| Low-fat milk (1%), $\frac{3}{4}$ c.                         | 32      | 10           | 7           | 2           | 89   |
| <u>Lunch</u>                                                |         |              |             |             |      |
| Pizza                                                       |         |              |             |             |      |
| Crust, 1/6 of 12' diameter                                  | 70      | 31           | 4           | 5           | 188  |
| Mozzarella cheese, low-fat, $\frac{1}{2}$ c.                | NA      | 2            | 16          | 10          | 158  |
| Tomato sauce, $\frac{1}{4}$ c.                              | 38      | 4            | 1           | 0           | 18   |
| Watermelon, 1 $\frac{1}{4}$ c.                              | 76      | 14           | 1           | 1           | 61   |
| <u>Afternoon Snack</u>                                      |         |              |             |             |      |
| Pretzels, $\frac{1}{2}$ c.                                  | 83      | 22           | 2           | .5          | 76   |
| <u>Dinner</u>                                               |         |              |             |             |      |
| Roasted chicken breast with skin, 1 c.                      | NA      | 0            | 40          | 10          | 264  |
| Green beans, 1 $\frac{1}{4}$ c.                             | NA      | 11           | 2           | 0           | 47   |
| Mashed potatoes, instant, 1 c.                              | 85      | 28           | 4           | 5           | 166  |
| Roll, white, soft, 2'                                       | 70      | 14           | 2           | 1           | 80   |
| Angel food cake, 1/24 of 10" cake                           | 67      | 17           | 2           | 0           | 72   |
| <u>Evening Snack</u>                                        |         |              |             |             |      |
| Whole-grain snack bar, chocolate chip (Kudos brand)         | 62      | 20           | 7.7         | 4.8         | 79   |
| Mozzarella string cheese, low-fat                           | NA      | 1            | 1           | 3.5         | 120  |
| <b>Daily Totals</b>                                         | mean=64 | 239<br>(52%) | 96<br>(23%) | 48<br>(25%) | 1714 |

Online-Only Table, continued. High and low glycemic index dietary conditions

|                                                                               | GI      | CHO (g)      | Protein (g)  | Fat (g)     | Kcal |
|-------------------------------------------------------------------------------|---------|--------------|--------------|-------------|------|
| <b>LOW GI DIETARY CONDITION</b>                                               |         |              |              |             |      |
| <u>Breakfast</u>                                                              |         |              |              |             |      |
| Fruit smoothie†                                                               |         |              |              |             |      |
| Strawberries, unsweetened, 1c.                                                | 40      | 20           | 1            | 0           | 77   |
| Banana, ½ c.                                                                  | 51      | 18           | 1            | 0           | 69   |
| Yogurt, sugar-free fat-free, 1/3 c.                                           | 24      | 6            | 3            | 0           | 37   |
| Almonds, 7                                                                    | NA      | 2            | 2            | 4           | 49   |
| Oat bran muffin (100% oat bran)*                                              | 55      | 18           | 5            | 3           | 98   |
| <u>Lunch</u>                                                                  |         |              |              |             |      |
| Chili                                                                         |         |              |              |             |      |
| Kidney beans, ½ c. †                                                          | 28      | 20           | 7            | 0           | 109  |
| Corn, ½ c.                                                                    | 48      | 20           | 3            | 1           | 88   |
| Ground beef, 7% fat, 3 oz.                                                    | NA      | 0            | 21           | 14          | 213  |
| Tomato sauce, ½ c.                                                            | 38      | 9            | 2            | 0           | 37   |
| Apple, 1 small                                                                | 40      | 16           | 0            | 0           | 63   |
| <u>Afternoon Snack</u>                                                        |         |              |              |             |      |
| Peach sorbet (whipped frozen unsweetened peaches) †                           | 42      | 14           | 1            | 0           | 54   |
| <u>Dinner</u>                                                                 |         |              |              |             |      |
| Chicken & vegetable stir-fry                                                  |         |              |              |             |      |
| Chicken breast, ¾ c.                                                          | NA      | 0            | 31           | 4           | 166  |
| Stir-fry vegetable mix, 2/3 c.                                                | NA      | 15           | 3            | 3           | 92   |
| Canola oil, ½ T.                                                              | NA      | 0            | 0            | 7           | 62   |
| Brown basmati rice, ¾ c.                                                      | 55      | 34           | 4            | 1           | 162  |
| Sprouted wheat bread (Diabetic Lifestyles brand), 1 slice                     | 55      | 15           | 5            | 0           | 80   |
| Black bean brownie*†<br>(made with black beans & prowashonupana barley flour) | 35      | 17           | 1            | 3           | 88   |
| <u>Evening Snack</u>                                                          |         |              |              |             |      |
| Soy snack bar (Revival brand)                                                 | 47      | 30           | 20           | 9           | 240  |
| <b>Daily Totals</b>                                                           | mean=40 | 264<br>(51%) | 108<br>(24%) | 50<br>(25%) | 1788 |

Online-Only Table, continued. High and low glycemic index dietary conditions.

\* These items were prepared using recipes developed for this study, with the GI calculated from the constituting ingredients.

† A vitamix blender was used to prepare these foods. The fruit smoothie and the sorbet were blended from the whole foods listed. For the chili,  $\frac{1}{4}$  c. of the beans were pureed to increase palatability. For the brownies, the beans were pureed and the flour ground from whole barley.

Online-Only Figure. Frequency of hypoglycemia (blood glucose < 80 mg/dl) for high and low glycemic index dietary conditions

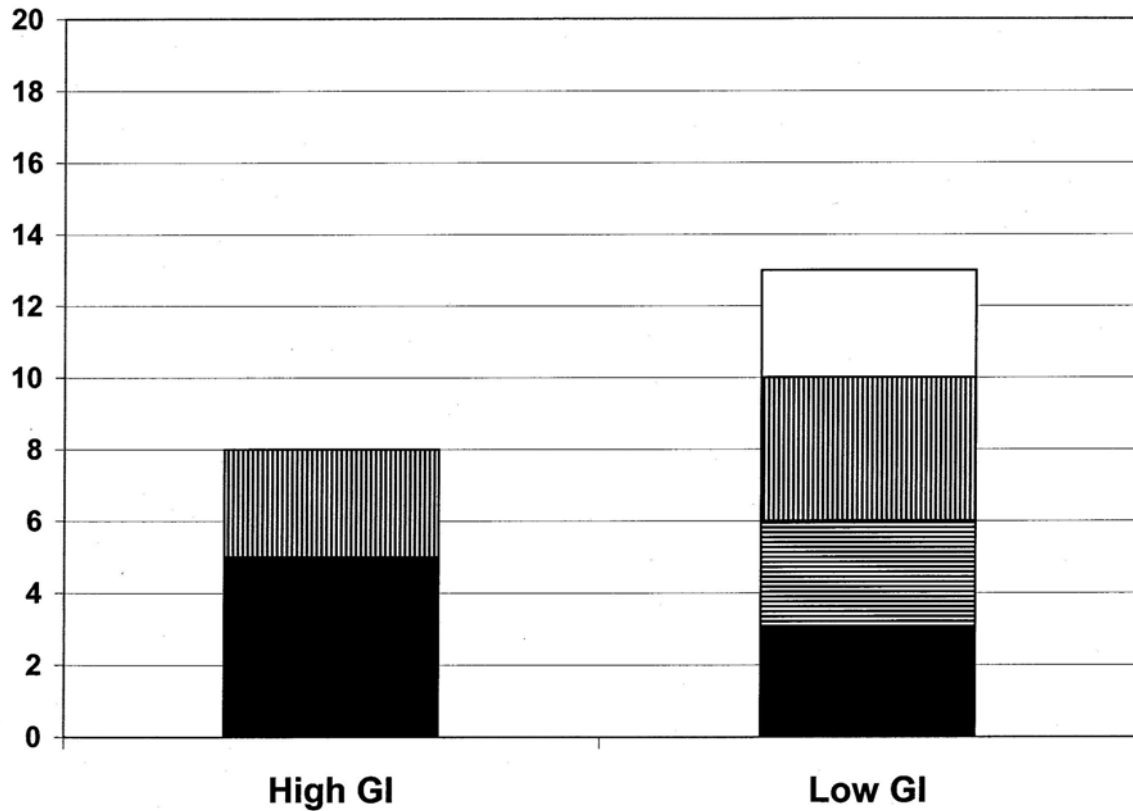

Figure 2 Legend:

Black = 1 episode  
Horizontal Bars = 2 episodes  
Vertical Bars = 3 episodes  
White = 4 episodes
